# Supplementary material
Source: PubMed Central journal article supplement (PMC4015139)
Supplement: NIHMS571987-supplement-supplement_1.pdf [file NIHMS571987-supplement-supplement_1.pdf]

Type of file: table

Label: Table 01

Filename: Table 1s.docx

Table 1s. Primers for real-time RT-PCR (Q-PCR)

| <b>Human</b>                    |                       |                        |
|---------------------------------|-----------------------|------------------------|
| Gene                            | Sense                 | Antisense              |
| <b>iNOS</b>                     | ACAGGAGGGGTTAAAGCTGC  | TTGTCTCCAAGGGACCAGG    |
| <b>IFN<math>\beta</math></b>    | CATTACCTGAAGGCCAAGGA  | CTGACTATGGTCCAGGCACA   |
| <b>TNF<math>\alpha</math></b>   | GGCGTGGAGCTGAGAGATAAC | GGTGTGGGTGAGGAGCACAT   |
| <b>IP-10</b>                    | GAATCGAAGGCCATCAAGAA  | GCTCCCCTCTGGTTTTAAGG   |
| <b>IL-1<math>\beta</math></b>   | GCTGAGGAAGATGCTGGTTC  | TCCATATCCTGTCCCTGGAG   |
| <b>RANTES</b>                   | TACACCAGTGGCAAGTGCTC  | ACACACTTGGCGGTTCTTTC   |
| <b>IL-6</b>                     | TACCCCGAGGAGAAGATTCC  | GCCATCTTTGGAAGGTTCCAG  |
| <b>IL-27</b>                    | GGAGCGTCTCTGCTTCATCT  | AGCTGCATCCTCTCCATGTT   |
| <b>PBDA</b>                     | ACGATCCCGAGACTCTGCTTC | GCACGGCTACTGGCACACT    |
| <b>Mouse</b>                    |                       |                        |
| Gene                            | Sense                 | Antisense              |
| <b>iNOS</b>                     | GGCAGCCTGTGAGACCTTTG  | GCATTGGAAGTGAAGCGTTTC  |
| <b>IFN<math>\beta</math></b>    | CAGCTCCAAGAAAGGACGAAC | GGCAGTGTAACCTTTCTGCAT  |
| <b>TNF<math>\alpha</math></b>   | ACGGCATGGATCTCAAAGAC  | GTGGGTGAGGAGCACGTAGT   |
| <b>IP-10</b>                    | TCCTTGTCTCCCTAGCTCA   | ATAACCCCTTGGGAAGATGG   |
| <b>IL-1<math>\beta</math></b>   | CAGGCAGGCAGTATCACTCA  | TGTCCTCATCCTGGAAGGTC   |
| <b>RANTES</b>                   | ATATGGCTCGGACACCACTC  | GTGACAAACACGACTGCAAGA  |
| <b>IL-6</b>                     | ATGGATGCTACCAAAGTGGAT | TGAAGGACTCTGGCTTTGTCT  |
| <b>IL-27</b>                    | ATCTCGATTGCCAGGAGTGA  | GTGGTAGCCGAGGAAGCAGAGT |
| <b><math>\beta</math>-Actin</b> | TGCACCACCAACTGCTTAG   | GGATGCAGGGATGATGTTTC   |
